# Supplementary material
Source: publisher figshare collection journal article supplement (https://gsajournals.figshare.com/ndownloader/files/17412935)
Supplement: Supplementary file 1 [file 17412935]

## Sheet: Sheet1
Table S4 The sample size of each partition used for FST comparisons
Comparison	Categories	Partition	Sample size
3 level	Elevation	below 1,500m	498
3 level	Elevation	1,500m-3,000m	232
3 level	Elevation	3,000m	55
3 level	Latitude	Below 30˚N	168
3 level	Latitude	30-40˚N	318
3 level	Latitude	Above 40˚N	299
2 level	Elevation	above 3,000 m	55
2 level	Elevation	below 3,000 m	730
2 level	Low Latitude	Below 30˚N	168
2 level	Low Latitude	30-40˚N	318
2 level	High latitude	Above 40˚N	299
2 level	High latitude	N30-40˚ N	318
2 level	Growth habit	Spring	579
2 level	Growth habit	Winter	122
2 level	Longitude	lower than E48	516
2 level	Longitude	higher than E48	269
